# Supplementary material for: Strategies for the synthesis of fluorinated polyesters
Source: Royal Society of Chemistry journal article supplement (doi:10.1039/c8ra10341k), 2019-01-01
Supplement: c8ra10341k1.pdf [file c8ra10341k1.pdf]

## Supporting Information

Xiaoman Zhao<sup>a,b</sup>, Jennifer Noro<sup>c</sup>, Jiajia Fu<sup>a,b</sup>, Carla Silva<sup>\*c</sup>, Artur Cavaco-Paulo<sup>a,b,c\*</sup>

<sup>a</sup>Jiangsu Engineering Technology Research Center for Functional Textiles, Jiangnan University, Wuxi 214122, P.R. China

<sup>b</sup>International Joint Research Laboratory for Textile and Fiber Bioprocesses, Jiangnan University, Wuxi 214122, P.R. China

<sup>c</sup>Centre of Biological Engineering, University of Minho, Campus de Gualtar, Braga 4710-057, Portugal

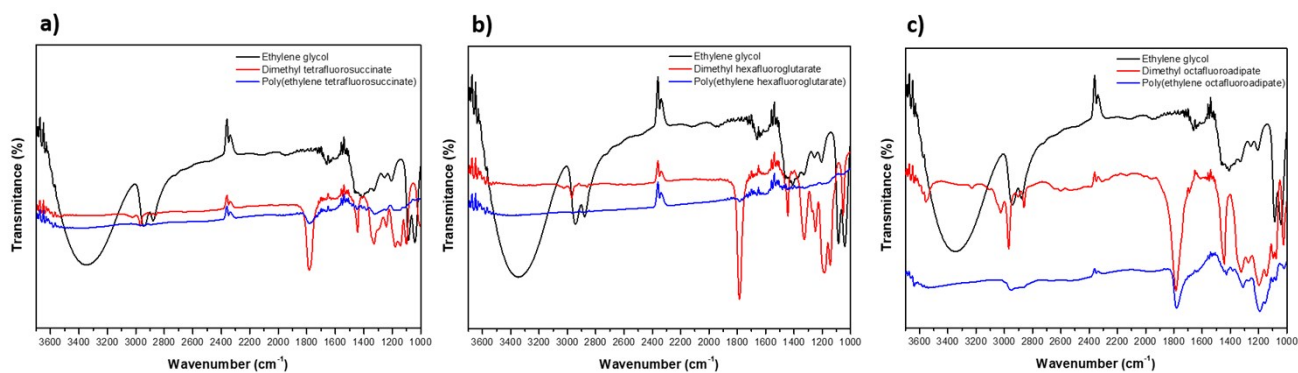

**Figure S1.** FTIR spectra of the polyesters obtained through the synthesis of fluorinated compounds, **a)** DMTFS, **b)** DMHFG, **c)** DMOFA, and ethylene glycol, with CALB as catalysts, under the optimal conditions (1h US followed by 6h vacuum at 40 °C).

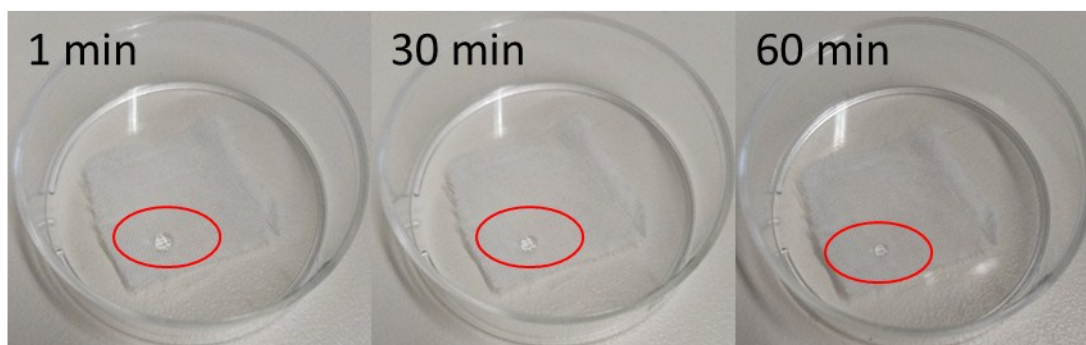

**Figure S2.** Time of water drop absorption of cotton samples coated with poly(ethylene tetrafluorosuccinate); the coating was performed by placing the cotton samples in the same container as the initial reactants and let the reaction to proceed (water bath; 6h, 40 °C).

**Table S1.** Infrared absorption assignments of the synthesized fluorinated polyesters

|                                     | Wavenumber (cm <sup>-1</sup> ) |                |                        |             |                |                |
|-------------------------------------|--------------------------------|----------------|------------------------|-------------|----------------|----------------|
|                                     | O-H stretching                 | C-H stretching | C=O stretching (ester) | C-H bending | C-F stretching | C-O stretching |
| Ethylene glycol                     | 3355                           | 2947, 2881     | -                      | 1411, 1330  | -              | 1087, 1045     |
| DMTFS                               | -                              | 2968, 2861     | 1784                   | 1444, 1328  | 1178, 1143     | 1101, 1004     |
| DMHFG                               | -                              | 2969, 2861     | 1785                   | 1444, 1327  | 1185, 1143     | 1052           |
| DMOFA                               | -                              | 2969, 2860     | 1784                   | 1444, 1325  | 1197, 1145     | 1077, 1024     |
| Poly(ethylene tetrafluorosuccinate) | 3236                           | 2968           | 1783                   | 1481, 1323  | 1181           | 1099           |
| Poly(ethylene hexafluoroglutarate)  | 3363                           | 2970           | 1710                   | 1482, 1328  | 1145           | 1053           |
| Poly(ethylene octafluoroadipate)    | 3328                           | 2951           | 1780                   | 1428, 1310  | 1190           | 1020           |
